# Supplementary material for: High-performance visible-to-near infrared phototransistor based on SnSe/SnS 2 van der Waals heterostructure
Source: Royal Society of Chemistry journal article supplement (doi:10.1039/d4tc05309e), 2025-01-01
Supplement: d4tc05309e1.pdf [file d4tc05309e1.pdf]

## **Supplementary Materials for**

High-performance visible-to-near infrared  
phototransistor based on SnSe/SnS<sub>2</sub> van der  
Waals heterostructure

## Supporting Information

# High-performance visible-to-near infrared phototransistor based on SnSe/SnS<sub>2</sub> van der Waals heterostructure

Gaoning Fan <sup>a</sup>, Weishuai Duan <sup>a</sup>, Mengjiao Dong <sup>a</sup>, Xueting Luo <sup>a</sup>, Pengyu Zhou <sup>c,\*</sup>, Chun Sun <sup>a</sup>, Yonghui Zhang <sup>a</sup>, Mengjun Wang <sup>a</sup>, Chao Fan <sup>a,b,\*</sup>

- a. State Key Laboratory of Reliability and Intelligence of Electrical Equipment, Hebei University of Technology, Tianjin, 300401, China.
- b. CNOOC RAIBORN(Tianjin)Technology Co.,Ltd, Tianjin, 300450, China.
- c. School of Science, Northeast Electric Power University, Jilin, 132012, China.

## Contents list

1. OM images of the SnS<sub>2</sub> and SnSe single crystals.
2. Preparation of SnSe/SnS<sub>2</sub> heterostructure.
3. Transfer characteristic of the SnS<sub>2</sub>-based and SnSe-based phototransistor.
4. Response time of SnS<sub>2</sub> phototransistor under the illumination of a 405-nm laser.
5. Enlarged  $I_{ds}-V_{ds}$  curves of the SnSe/SnS<sub>2</sub> phototransistor.

## 1. OM images of the SnS<sub>2</sub> and SnSe single crystals.

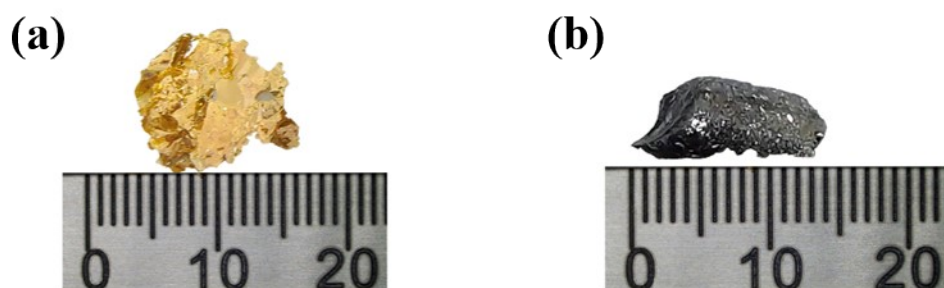

**Fig. S1.** OM images of the (a) SnS<sub>2</sub> and (b) SnSe single crystals

SnS<sub>2</sub> and SnSe single crystals have been grown via a CVT technique. Fig. S1 shows optical microscopy (OM) images of the (a) SnS<sub>2</sub> and (b) SnSe single crystals. Fig. S1 (a) shows a golden-yellow SnS<sub>2</sub> single crystal, which has a lateral dimension of approximately 12 mm. Fig. S1 (b) demonstrates SnSe single crystals, which can be seen to have transverse dimensions up to 11 mm and exhibit a dark grey metallic luster.

## 2. Preparation of SnSe/SnS<sub>2</sub> heterostructure.

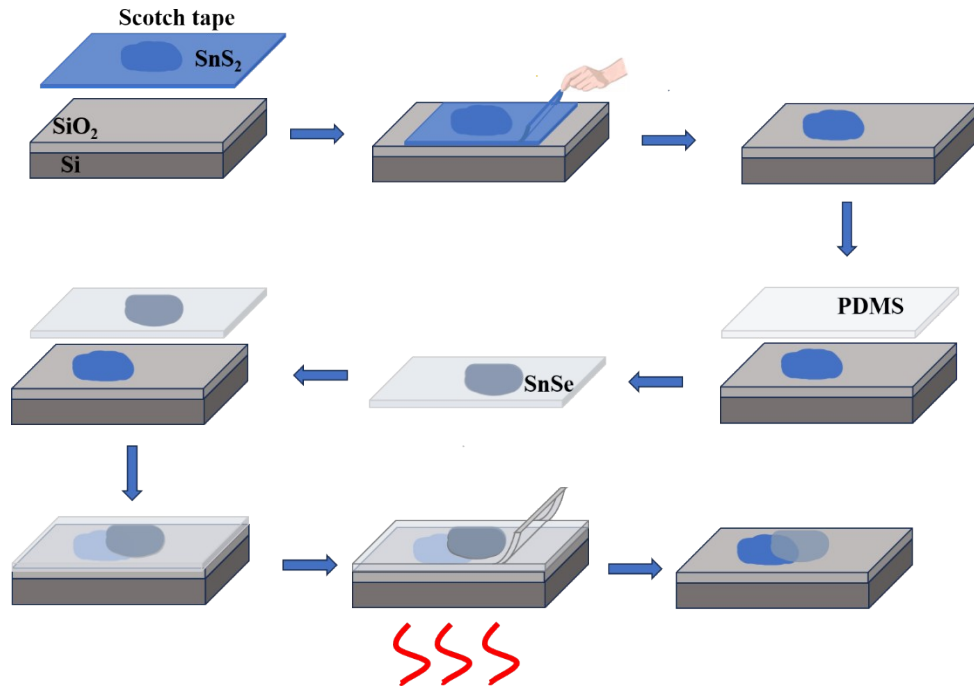

**Fig. S2.** Processes of the mechanical exfoliation and PDMS-assisted dry-transfer method of the SnSe/SnS<sub>2</sub> heterostructure

As shown in Fig. S2, SnS<sub>2</sub> and SnSe thin layers were mechanically exfoliated from the bulk crystals with a Scotch tape. Then the SnSe/SnS<sub>2</sub> heterostructure was prepared using a PDMS-assisted dry-transfer method. Firstly, a SnS<sub>2</sub> thin layer was exfoliated and transferred onto a SiO<sub>2</sub>/ Si (SiO<sub>2</sub>: 300 nm thick, Si: 400 μm thick) substrate. Secondly, a SnSe thin layer was transferred onto the above of the SnS<sub>2</sub> thin layer with assistance of a PDMS layer. Finally, after releasing the PDMS layer, a SnS<sub>2</sub>/ SnSe heterostructure was formed.

### 3. Transfer characteristic of the SnS<sub>2</sub>-based and SnSe-based phototransistor.

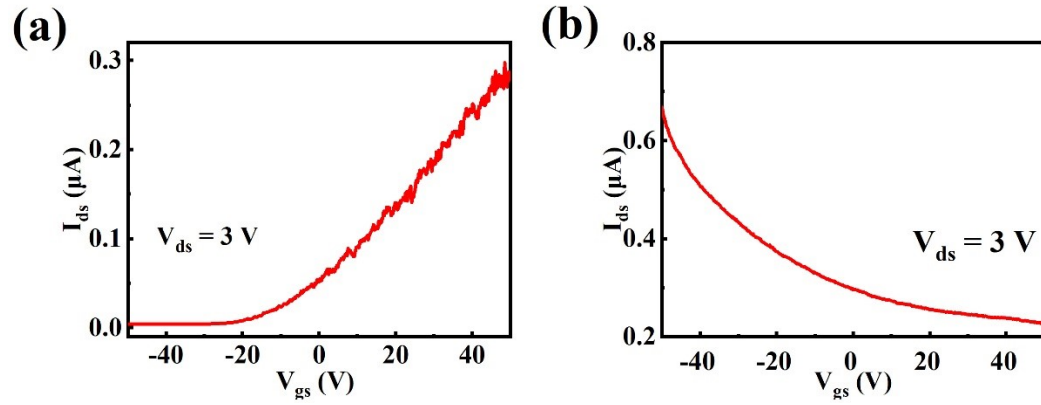

**Fig. S3.** Transfer characteristic of the (a) SnS<sub>2</sub>-based and (b) SnSe-based phototransistor at  $V_{ds}=3$

V

The mobility ( $\mu$ ) of the SnS<sub>2</sub>-based and SnSe-based phototransistor can be determined using the following formula:

$$\mu = \frac{dI_{ds}}{dV_{gs}} \times \frac{L}{W \times C_{ox} \times V_{ds}}$$

Where the channel length  $L$  and width  $W$  are 6 and 4  $\mu m$ , respectively.  $C_{ox}$  is the capacitance of the SiO<sub>2</sub> ( $11.51 \times 10^{-5}$  F m<sup>-2</sup>). The calculated mobilities of the SnS<sub>2</sub>-based and SnSe-based phototransistor are 0.18 cm<sup>2</sup> V<sup>-1</sup> s<sup>-1</sup> and 0.37 cm<sup>2</sup> V<sup>-1</sup> s<sup>-1</sup>, respectively.

#### 4. Response time of SnS<sub>2</sub> phototransistor under the illumination of a 405 nm laser.

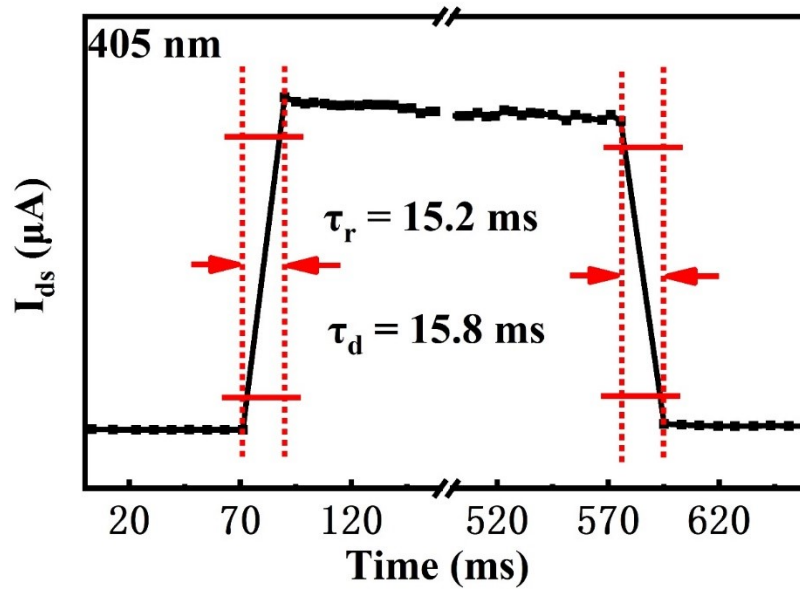

**Fig. S4.** Rise and decay time of SnS<sub>2</sub> phototransistor under 405 nm laser

As shown in Fig. S4, the rise time and decay time of the tin disulfide phototransistor under 405 nm laser illumination are 15.2 ms and 15.8 ms, respectively.

### 5. Enlarged $I_{ds}-V_{ds}$ curves of the SnSe/SnS<sub>2</sub> phototransistor.

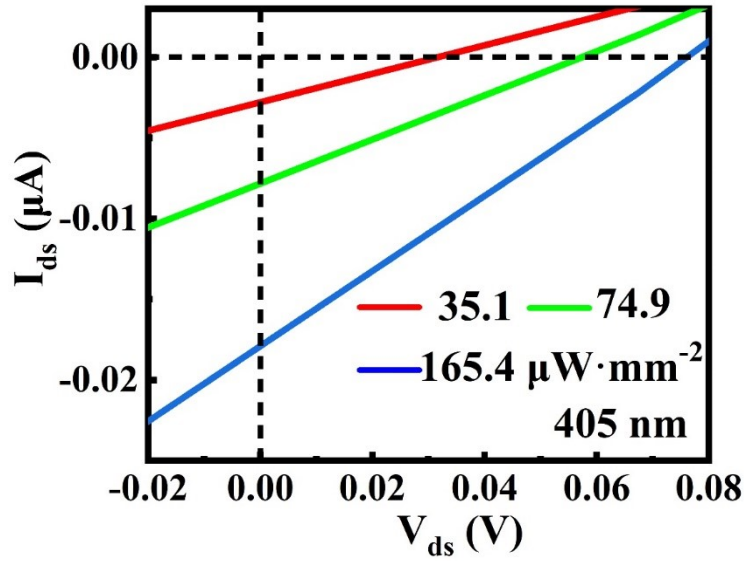

**Fig. S5.** Enlarged  $I_{ds}-V_{ds}$  curves of the SnSe/SnS<sub>2</sub> phototransistor under 405 nm illumination with different light power densities.

Fig. S5 zooms in the  $I_{ds}-V_{ds}$  curves of the SnSe/SnS<sub>2</sub> phototransistor under 405 nm illumination with different light power densities, which shows a remarkable photovoltaic behavior.  $I_{sc}$  and  $V_{oc}$  increased with the increase of light power density. Moreover, when the light power density reaches 165.4  $\mu\text{W}\cdot\text{mm}^{-2}$ , the phototransistor exhibits a maximum  $I_{sc}$  and  $V_{oc}$  of 17.6 nA and 75 mV.
